# Supplementary material
Source: PubMed Central journal article supplement (PMC11656291)
Supplement: JMV-96-0-s001.pdf [file JMV-96-0-s001.pdf]

**Table S3. Single nucleotide variants and their frequencies (%) in each studied specimen (Table S1), relative to MN908947.3 reference genome.**

*Position* genome position (MN908947.3 coordinates); *ref* reference base; *alt* alternative base; *aa* amino acid mutation and corresponding codon position (MN908947.3 coordinates); *ND* not detected.

| position | ref | alt | gene | aa     | 13    | 14    | 15    | 16    | 42    | 43    | 44    | 46    | 52    | 53    | 54    | 55    | 56    | 62    | 63    | 64    | 65    | 66    |
|----------|-----|-----|------|--------|-------|-------|-------|-------|-------|-------|-------|-------|-------|-------|-------|-------|-------|-------|-------|-------|-------|-------|
| 670      | T   | G   | nsp1 | S135R  | ND    | ND    | ND    | ND    | 100.0 | 100.0 | 100.0 | 100.0 | 99.9  | 100.0 | 100.0 | 100.0 | 100.0 | 100.0 | 100.0 | 100.0 | 100.0 | 100.0 |
| 694      | T   | A   | nsp1 | F143L  | ND    | ND    | ND    | ND    | 99.7  | 99.5  | 99.6  | 89.7  | ND    |
| 1027     | T   | C   | nsp2 | P74P   | ND    | 5.8   | ND    | ND    |
| 1150     | C   | T   | nsp2 | G115G  | ND    | 5.9   | ND    | ND    |
| 1627     | C   | T   | nsp2 | L274L  | ND    | 99.9  | 100.0 | 99.9  | 100.0 | 100.0 | 99.9  | 73.8  | 92.4  | ND    | 99.8  |
| 2388     | C   | T   | nsp2 | T528I  | ND    | 17.6  | 15.5  | 100.0 | ND    |
| 2422     | G   | T   | nsp2 | K539N  | ND    | 5.2   | ND    |
| 2470     | C   | T   | nsp2 | A555A  | 100.0 | 99.9  | 100.0 | 99.9  | ND    |
| 2524     | A   | G   | nsp2 | T573T  | ND    | ND    | ND    | 3.0   | ND    |
| 2790     | C   | T   | nsp3 | T24I   | ND    | ND    | ND    | ND    | 100.0 | 100.0 | 99.9  | 100.0 | 100.0 | 100.0 | 100.0 | 100.0 | 100.0 | 100.0 | 100.0 | 100.0 | 100.0 | 100.0 |
| 2832     | A   | G   | nsp3 | K38R   | 99.9  | 99.9  | 99.8  | 100.0 | ND    |
| 3037     | C   | T   | nsp3 | F106F  | 100.0 | 100.0 | 100.0 | 100.0 | 100.0 | 100.0 | 100.0 | 100.0 | 100.0 | 100.0 | 100.0 | 100.0 | 100.0 | 100.0 | 100.0 | 100.0 | 100.0 | 100.0 |
| 3648     | T   | C   | nsp3 | I310T  | ND    | 3.5   | ND    |
| 3859     | A   | G   | nsp3 | Q380Q  | ND    | 5.3   |
| 4184     | G   | A   | nsp3 | G489S  | ND    | 100.0 | 100.0 | 100.0 | 100.0 | 100.0 |
| 4321     | C   | T   | nsp3 | A534A  | ND    | 100.0 | 100.0 | 99.9  | 100.0 | 100.0 |
| 4358     | C   | T   | nsp3 | Q547*  | ND    | 4.6   | ND    | ND    |
| 4925     | G   | T   | nsp3 | D736Y  | ND    | 5.0   | ND    | ND    |
| 5386     | T   | G   | nsp3 | A889A  | 99.8  | 100.0 | 100.0 | 100.0 | ND    |
| 5549     | C   | A   | nsp3 | L944I  | ND    | ND    | ND    | ND    | 100.0 | 100.0 | 100.0 | 100.0 | ND    |
| 5803     | T   | G   | nsp3 | Y1028* | ND    | 3.1   | ND    |
| 6041     | G   | C   | nsp3 | D1108H | ND    | 4.1   | ND    |
| 6354     | C   | T   | nsp3 | S1212L | ND    | 3.4   | ND    |
| 6515     | T   | A   | nsp3 | L1266I | 99.7  | 99.6  | 99.8  | 99.8  | ND    |
| 6675     | C   | T   | nsp3 | T1319I | ND    | ND    | ND    | ND    | 100.0 | 100.0 | 99.7  | 99.9  | ND    |
| 6822     | C   | T   | nsp3 | T1368I | ND    | 3.2   |
| 7312     | G   | T   | nsp3 | L1531F | ND    | 3.5   | ND    |
| 8302     | A   | G   | nsp3 | K1861K | ND    | ND    | ND    | ND    | ND    | ND    | 9.6   | ND    |
| 8354     | C   | T   | nsp3 | R1879C | ND    | 3.2   | ND    | ND    | ND    | ND    | ND    | ND    |
| 8393     | G   | A   | nsp3 | A1892T | 100.0 | 100.0 | 99.9  | 100.0 | ND    |
| 9196     | A   | G   | nsp4 | T214T  | ND    | 3.5   | ND    | ND    |
| 9344     | C   | T   | nsp4 | L264F  | ND    | ND    | ND    | ND    | 100.0 | 100.0 | 100.0 | 100.0 | ND    | ND    | ND    | ND    | ND    | 100.0 | 100.0 | 100.0 | 100.0 | 100.0 |
| 9424     | A   | G   | nsp4 | V290V  | ND    | ND    | ND    | ND    | 99.9  | 100.0 | 99.9  | 100.0 | ND    | ND    | ND    | ND    | ND    | 100.0 | 100.0 | 100.0 | 99.9  | 99.9  |



|       |   |   |       |       |       |       |       |       |       |       |       |       |       |       |       |       |       |       |       |       |       |       |
|-------|---|---|-------|-------|-------|-------|-------|-------|-------|-------|-------|-------|-------|-------|-------|-------|-------|-------|-------|-------|-------|-------|
| 15377 | G | T | nsp12 | C646F | ND    | 3.4   | ND    | ND    |
| 15472 | G | C | nsp12 | G678R | ND    | 3.0   | ND    | ND    |
| 15629 | G | A | nsp12 | C730Y | ND    | ND    | ND    | ND    | 8.9   | ND    |
| 15714 | C | T | nsp12 | L758L | ND    | ND    | ND    | ND    | 100.0 | 100.0 | 100.0 | 100.0 | ND    | ND    | ND    | ND    | ND    | 100.0 | 100.0 | 100.0 | 100.0 | 100.0 |
| 16206 | G | T | nsp12 | E922D | ND    | 3.0   | ND    |
| 16977 | T | C | nsp13 | V247V | ND    | 24.4  | ND    |
| 17020 | T | C | nsp13 | F262L | ND    | 3.8   | ND    |
| 17104 | C | T | nsp13 | H290Y | ND    | 98.6  | 72.8  | 91.4  | 10.4  | 99.8  |
| 17130 | C | T | nsp13 | Y298Y | ND    | 8.4   | ND    |
| 17410 | C | T | nsp13 | R392C | ND    | ND    | ND    | ND    | 99.9  | 100.0 | 99.9  | 100.0 | 100.0 | 100.0 | 100.0 | 100.0 | 100.0 | 100.0 | 100.0 | 100.0 | 100.0 | 100.0 |
| 18160 | G | A | nsp14 | D41N  | ND    | 20.1  | ND    |
| 18163 | A | G | nsp14 | I42V  | 98.9  | 99.7  | 96.3  | 100.0 | 100.0 | 100.0 | 99.9  | 100.0 | 100.0 | 100.0 | 99.9  | 100.0 | 100.0 | 100.0 | 99.9  | 100.0 | 99.9  | 100.0 |
| 18163 | A | T | nsp14 | I42L  | ND    | ND    | 3.6   | ND    |
| 18416 | A | G | nsp14 | D126G | ND    | 21.5  | ND    |
| 18685 | T | G | nsp14 | C216G | ND    | 5.3   | ND    |
| 19024 | C | T | nsp14 | L329F | ND    | 3.5   | ND    |
| 19955 | C | T | nsp15 | T112I | ND    | 100.0 | 100.0 | 99.7  | 100.0 | 100.0 | 100.0 | 100.0 | 100.0 | 100.0 | 100.0 |
| 20055 | A | G | nsp15 | E145E | ND    | 98.8  | 100.0 | 99.5  | 98.6  | 96.8  | ND    | ND    | ND    | ND    | ND    |
| 20933 | G | T | nsp16 | G92V  | ND    | 5.3   | ND    | ND    |
| 21077 | C | T | nsp16 | T140I | ND    | 97.5  | 78.8  | 89.8  | ND    | 99.9  |
| 21381 | C | A | nsp16 | S241S | ND    | 5.9   | ND    | ND    |
| 21595 | C | T | S12   | V11V  | 100.0 | 100.0 | 100.0 | 100.0 | ND    |
| 21618 | C | T | S12   | T19I  | ND    | ND    | ND    | ND    | 100.0 | 100.0 | 99.8  | 100.0 | 100.0 | 100.0 | 100.0 | 100.0 | 100.0 | 100.0 | 100.0 | 100.0 | 100.0 | 100.0 |
| 21641 | G | T | S12   | A27S  | ND    | 99.8  | 98.5  | 100.0 | 99.7  | 99.8  | 99.4  | 98.3  | 100.0 | 100.0 | 99.4  |
| 21762 | C | T | S12   | A67V  | 100.0 | 100.0 | 100.0 | 100.0 | ND    |
| 21770 | G | A | S12   | V70I  | ND    | 100.0 | 100.0 | 100.0 | 98.9  | 94.7  | 100.0 | 100.0 | 98.7  | 100.0 | 100.0 |
| 21846 | C | T | S12   | T95I  | 100.0 | 100.0 | 100.0 | 99.9  | ND    |
| 21869 | G | T | S12   | G103C | ND    | 3.8   | ND    |
| 21987 | G | A | S12   | G142D | ND    | 100.0 | 100.0 | 100.0 | 100.0 | 99.9  | 100.0 | 100.0 | 100.0 | 100.0 | 100.0 |
| 22200 | T | G | S12   | V213G | ND    | 100.0 | 100.0 | 100.0 | 100.0 | 100.0 |
| 22578 | G | A | S12   | G339D | 100.0 | 100.0 | 100.0 | 100.0 | 100.0 | 100.0 | 100.0 | 100.0 | 100.0 | 99.9  | 100.0 | 100.0 | 100.0 | 99.9  | 100.0 | 100.0 | 99.9  | 99.9  |
| 22599 | G | A | S12   | R346K | 100.0 | 100.0 | 100.0 | 100.0 | ND    |
| 22673 | T | C | S12   | S371P | 99.9  | 100.0 | 100.0 | 100.0 | ND    |
| 22674 | C | T | S12   | S371F | 99.9  | 100.0 | 99.9  | 100.0 | 100.0 | 100.0 | 100.0 | 100.0 | 100.0 | 100.0 | 100.0 | 99.9  | 100.0 | 100.0 | 100.0 | 100.0 | 100.0 | 100.0 |
| 22679 | T | C | S12   | S373P | 100.0 | 100.0 | 100.0 | 100.0 | 100.0 | 100.0 | 100.0 | 100.0 | 100.0 | 100.0 | 100.0 | 100.0 | 100.0 | 100.0 | 100.0 | 100.0 | 100.0 | 100.0 |
| 22686 | C | T | S12   | S375F | 99.9  | 99.9  | 99.7  | 100.0 | 100.0 | 99.6  | 100.0 | 99.9  | 100.0 | 99.9  | 100.0 | 100.0 | 99.9  | 99.9  | 99.9  | 99.9  | 100.0 | 99.9  |
| 22688 | A | G | S12   | T376A | ND    | ND    | ND    | ND    | 100.0 | 100.0 | 100.0 | 99.9  | 100.0 | 100.0 | 100.0 | 100.0 | 100.0 | 100.0 | 100.0 | 100.0 | 99.9  | 100.0 |
| 22775 | G | A | S12   | D405N | ND    | ND    | ND    | ND    | 100.0 | 100.0 | 100.0 | 100.0 | 99.7  | 100.0 | 100.0 | 99.9  | 100.0 | 99.6  | 100.0 | 100.0 | 100.0 | 99.7  |

|       |   |   |       |        |       |       |       |       |       |       |       |       |       |       |       |       |       |       |       |       |       |       |
|-------|---|---|-------|--------|-------|-------|-------|-------|-------|-------|-------|-------|-------|-------|-------|-------|-------|-------|-------|-------|-------|-------|
| 22786 | A | C | S12   | R408S  | ND    | ND    | ND    | ND    | 100.0 | 99.7  | 99.4  | 99.9  | 99.9  | 100.0 | 99.9  | 99.9  | 99.9  | 99.9  | 99.8  | 99.9  | 99.9  | 99.9  |
| 22801 | G | A | S12   | G413G  | ND    | 7.3   | ND    | ND    | ND    | ND    | ND    | ND    |
| 22813 | G | T | S12   | K417N  | 100.0 | 100.0 | 100.0 | 100.0 | 100.0 | 100.0 | 100.0 | 100.0 | 100.0 | 100.0 | 100.0 | 100.0 | 100.0 | 100.0 | 100.0 | 100.0 | 100.0 | 100.0 |
| 22882 | T | G | S12   | N440K  | 100.0 | 100.0 | 100.0 | 100.0 | ND    |
| 22898 | G | A | S12   | G446S  | 99.9  | 99.9  | 99.9  | 100.0 | ND    |
| 22992 | G | A | S12   | S477N  | 100.0 | 99.9  | 100.0 | 99.9  | ND    |
| 22995 | C | A | S12   | T478K  | 100.0 | 100.0 | 100.0 | 100.0 | ND    |
| 23013 | A | C | S12   | E484A  | 100.0 | 99.9  | 99.9  | 100.0 | ND    |
| 23040 | A | G | S12   | Q493R  | 99.9  | 100.0 | 100.0 | 100.0 | ND    |
| 23048 | G | A | S12   | G496S  | 100.0 | 100.0 | 100.0 | 100.0 | ND    |
| 23055 | A | G | S12   | Q498R  | 100.0 | 100.0 | 100.0 | 100.0 | ND    |
| 23063 | A | T | S12   | N501Y  | 100.0 | 100.0 | 100.0 | 100.0 | ND    |
| 23075 | T | C | S12   | Y505H  | 100.0 | 100.0 | 99.9  | 100.0 | ND    |
| 23202 | C | A | S12   | T547K  | 100.0 | 100.0 | 100.0 | 99.9  | ND    |
| 23243 | C | T | S12   | P561S  | ND    | 3.7   | ND    | ND    |
| 23403 | A | G | S12   | D614G  | 100.0 | 100.0 | 100.0 | 100.0 | 100.0 | 100.0 | 100.0 | 100.0 | 100.0 | 100.0 | 100.0 | 100.0 | 100.0 | 100.0 | 100.0 | 100.0 | 99.9  | 100.0 |
| 23525 | C | T | S12   | H655Y  | 99.9  | 100.0 | 100.0 | 100.0 | 100.0 | 100.0 | 100.0 | 100.0 | 99.9  | 100.0 | 99.9  | 100.0 | 100.0 | 100.0 | 100.0 | 100.0 | 100.0 | 100.0 |
| 23599 | T | G | S12   | N679K  | 99.7  | 99.9  | 99.9  | 99.9  | 100.0 | 99.9  | 100.0 | 99.9  | 100.0 | 99.9  | 99.9  | 100.0 | 99.9  | 100.0 | 99.8  | 99.9  | 99.9  | 99.9  |
| 23604 | C | A | S12   | P681H  | 99.9  | 100.0 | 100.0 | 100.0 | 100.0 | 100.0 | 100.0 | 100.0 | 100.0 | 99.9  | 100.0 | 100.0 | 100.0 | 100.0 | 100.0 | 100.0 | 100.0 | 100.0 |
| 23854 | C | A | S12   | N764K  | 100.0 | 99.9  | 99.8  | 99.9  | ND    | ND    | ND    | ND    | 100.0 | 99.9  | 99.9  | 100.0 | 99.9  | 100.0 | 100.0 | 100.0 | 100.0 | 100.0 |
| 23948 | G | T | S12   | D796Y  | 100.0 | 100.0 | 100.0 | 100.0 | ND    | ND    | ND    | ND    | 100.0 | 100.0 | 100.0 | 100.0 | 100.0 | 100.0 | 100.0 | 99.9  | 100.0 | 100.0 |
| 23997 | C | T | S12   | P812L  | ND    | 3.7   | ND    |
| 24130 | C | A | S12   | N856K  | 100.0 | 99.9  | 100.0 | 99.9  | ND    |
| 24424 | A | T | S12   | Q954H  | 100.0 | 100.0 | 100.0 | 99.9  | 100.0 | 100.0 | 100.0 | 100.0 | 100.0 | 100.0 | 100.0 | 100.0 | 99.9  | 99.9  | 100.0 | 100.0 | 100.0 | 100.0 |
| 24469 | T | A | S12   | N969K  | 100.0 | 100.0 | 100.0 | 100.0 | 100.0 | 100.0 | 100.0 | 100.0 | 100.0 | 100.0 | 99.9  | 100.0 | 99.8  | 100.0 | 100.0 | 100.0 | 100.0 | 100.0 |
| 24503 | C | T | S12   | L981F  | 100.0 | 100.0 | 100.0 | 99.9  | ND    |
| 24763 | T | C | S12   | Y1067Y | ND    | 4.3   | ND    |
| 24794 | G | T | S12   | A1078S | ND    | 4.1   | ND    |
| 25000 | C | T | S12   | D1146D | 100.0 | 100.0 | 100.0 | 100.0 | 100.0 | 99.9  | 100.0 | 100.0 | 100.0 | 100.0 | 100.0 | 99.9  | 100.0 | 100.0 | 100.0 | 100.0 | 100.0 | 100.0 |
| 25139 | T | G | S12   | L1193V | 3.5   | 4.2   | 5.2   | 73.3  | ND    |
| 25157 | G | T | S12   | D1199Y | ND    | 3.2   | ND    |
| 25174 | A | G | S12   | G1204G | ND    | ND    | ND    | ND    | ND    | ND    | 9.4   | ND    |
| 25441 | C | T | ORF3a | Q17*   | ND    | 3.3   | ND    |
| 25555 | G | T | ORF3a | V55F   | ND    | ND    | ND    | ND    | 100.0 | 100.0 | 100.0 | 100.0 | ND    |
| 25584 | C | T | ORF3a | T64T   | 99.9  | 100.0 | 99.9  | 99.9  | 100.0 | 99.9  | 100.0 | 100.0 | 100.0 | 100.0 | 100.0 | 99.9  | 100.0 | 100.0 | 100.0 | 100.0 | 100.0 | 100.0 |
| 25621 | G | A | ORF3a | V77I   | ND    | ND    | ND    | 7.3   | ND    |
| 26060 | C | T | ORF3a | T223I  | ND    | ND    | ND    | ND    | 100.0 | 99.9  | 99.8  | 100.0 | 100.0 | 100.0 | 100.0 | 100.0 | 100.0 | 100.0 | 99.9  | 99.9  | 100.0 | 100.0 |
| 26270 | C | T | E     | T9I    | 99.9  | 100.0 | 100.0 | 100.0 | 100.0 | 100.0 | 100.0 | 100.0 | 100.0 | 100.0 | 100.0 | 100.0 | 99.9  | 100.0 | 100.0 | 100.0 | 100.0 | 100.0 |

|       |   |   |       |       |       |       |       |       |       |       |       |       |       |       |       |       |       |       |       |       |       |       |
|-------|---|---|-------|-------|-------|-------|-------|-------|-------|-------|-------|-------|-------|-------|-------|-------|-------|-------|-------|-------|-------|-------|
| 26374 | T | C | E     | C44R  | ND    | ND    | ND    | ND    | 3.8   | ND    |
| 26529 | G | A | M     | D3N   | ND    | 100.0 | 99.9  | 100.0 | 99.9  | 100.0 | 99.9  | 100.0 | 100.0 | 99.9  | 100.0 |
| 26530 | A | G | M     | D3G   | 99.9  | 100.0 | 100.0 | 99.9  | ND    |
| 26577 | C | G | M     | Q19E  | 99.9  | 100.0 | 100.0 | 100.0 | 100.0 | 100.0 | 100.0 | 100.0 | 100.0 | 100.0 | 100.0 | 100.0 | 100.0 | 100.0 | 100.0 | 100.0 | 100.0 | 100.0 |
| 26709 | G | A | M     | A63T  | 100.0 | 100.0 | 100.0 | 99.9  | 99.9  | 100.0 | 100.0 | 100.0 | 100.0 | 100.0 | 100.0 | 100.0 | 100.0 | 100.0 | 100.0 | 100.0 | 100.0 | 100.0 |
| 26858 | C | T | M     | F112F | ND    | ND    | ND    | ND    | 99.9  | 100.0 | 99.8  | 100.0 | ND    |
| 26885 | C | T | M     | N121N | ND    | 99.0  | 56.3  | 92.9  | ND    | 99.9  |
| 26895 | C | T | M     | H125Y | ND    | ND    | ND    | 3.5   | ND    |
| 27038 | A | G | M     | T172T | ND    | 100.0 | 100.0 | 100.0 | 100.0 | 99.9  | 99.3  | 54.3  | 91.8  | ND    | 99.8  |
| 27259 | A | C | ORF6  | R20R  | 99.9  | 99.9  | 99.9  | 100.0 | ND    |
| 27438 | T | C | ORF7a | C15C  | ND    | 34.0  | 21.5  | 99.9  | ND    |
| 27605 | T | C | ORF7a | V71A  | ND    | 97.6  | 56.9  | 85.1  | ND    | 99.9  |
| 27697 | C | T | ORF7a | L102F | ND    | 5.1   | 3.1   | ND    |
| 27807 | C | T | ORF7b | L18L  | 100.0 | 100.0 | 100.0 | 100.0 | ND    | ND    | ND    | ND    | 100.0 | 100.0 | 100.0 | 100.0 | 99.9  | 100.0 | 100.0 | 100.0 | 100.0 | 100.0 |
| 27969 | A | T | ORF8  | T26S  | ND    | 8.6   | ND    |
| 28311 | C | T | N     | P13L  | 100.0 | 100.0 | 99.9  | 99.9  | 100.0 | 100.0 | 100.0 | 100.0 | 100.0 | 99.6  | 100.0 | 100.0 | 100.0 | 100.0 | 100.0 | 100.0 | 100.0 | 100.0 |
| 28330 | A | G | N     | G19G  | ND    | 100.0 | 99.7  | 100.0 | 99.9  | 100.0 | 99.0  | 60.2  | 84.9  | ND    | 99.9  |
| 28363 | A | T | N     | G30G  | 99.4  | 100.0 | 99.4  | 99.4  | ND    | ND    | ND    | ND    | 99.4  | 100.0 | 99.4  | 100.0 | 100.0 | ND    | ND    | ND    | ND    | ND    |
| 28370 | A | G | N     | S33G  | 99.2  | 99.4  | 99.8  | 99.8  | ND    | ND    | ND    | ND    | 98.7  | 100.0 | 99.8  | ND    | 99.6  | 100.0 | 99.9  | 99.7  | 100.0 | 100.0 |
| 28378 | G | A | N     | A35A  | ND    | ND    | ND    | ND    | 100.0 | 100.0 | 100.0 | 100.0 | ND    |
| 28628 | G | C | N     | A119P | ND    | 4.9   | ND    | ND    |
| 28636 | T | G | N     | L121L | ND    | 6.3   | ND    | ND    | ND    | ND    | ND    | ND    |
| 28637 | C | G | N     | P122A | ND    | 4.5   | ND    | ND    | ND    | ND    | ND    | ND    |
| 28724 | C | T | N     | P151S | ND    | ND    | ND    | ND    | 100.0 | 100.0 | 100.0 | 100.0 | ND    |
| 28881 | G | A | N     | R203K | 100.0 | 99.8  | 99.9  | 99.9  | 99.9  | 99.9  | 99.9  | 100.0 | 99.9  | 100.0 | 100.0 | 100.0 | 100.0 | 99.9  | 99.9  | 100.0 | 100.0 | 99.9  |
| 28882 | G | A | N     | R203R | 100.0 | 100.0 | 100.0 | 100.0 | 100.0 | 100.0 | 100.0 | 100.0 | 99.9  | 100.0 | 100.0 | 100.0 | 100.0 | 100.0 | 100.0 | 100.0 | 100.0 | 100.0 |
| 28883 | G | C | N     | G204R | 100.0 | 99.9  | 99.9  | 100.0 | 100.0 | 100.0 | 100.0 | 100.0 | 99.9  | 100.0 | 99.9  | 100.0 | 100.0 | 100.0 | 100.0 | 99.9  | 99.9  | 99.9  |
| 29510 | A | C | N     | S413R | ND    | ND    | ND    | ND    | 100.0 | 100.0 | 99.9  | 100.0 | 100.0 | 100.0 | 100.0 | 99.9  | 100.0 | 100.0 | 100.0 | 100.0 | 100.0 | 100.0 |
| 29514 | C | T | N     | A414V | ND    | ND    | ND    | ND    | 3.6   | ND    |
| 29517 | A | G | N     | D415G | 6.8   | ND    | 7.9   | 5.8   | 14.4  | 5.6   | ND    | 7.8   | 12.6  | 10.3  | 9.2   | 10.6  | 7.6   | 6.8   | 8.2   | 11.8  | 6.4   | 10.1  |
| 29518 | C | G | N     | D415E | 3.7   | ND    | 3.7   | ND    | 4.6   | ND    | ND    | ND    | 4.1   | 3.1   | 3.5   | 4.0   | ND    | ND    | ND    | 4.1   | ND    | 3.2   |
| 29518 | C | T | N     | D415D | 4.7   | ND    | 3.5   | ND    | 4.6   | ND    | ND    | ND    | 3.7   | 3.4   | 4.9   | 4.7   | 3.7   | ND    | 3.4   | 5.2   | ND    | 4.3   |
| 29580 | C | T | ORF10 | A8V   | ND    | 4.8   | ND    | ND    | ND    | ND    |
| 29666 | C | T | ORF10 | L37F  | ND    | 46.3  | 15.2  | 100.0 | ND    | ND    |
