# Supplementary material
Source: PubMed Central journal article supplement (PMC11656291)
Supplement: JMV-96-0-s004.pdf [file JMV-96-0-s004.pdf]

**Table S1.** SARS-CoV-2 diagnosis in 71 organ specimens using three techniques (M1-3), and data retrieved from the corresponding autopsies.

| specimen | tissue <sup>(1)</sup> | M1 | M2                    | M3 | case | status <sup>(2)</sup> | heart pathol. <sup>(3)</sup> | lung pathol. <sup>(4)</sup> | lung radiol. <sup>(5)</sup> | age | bmi   | immunization <sup>(6)</sup> |
|----------|-----------------------|----|-----------------------|----|------|-----------------------|------------------------------|-----------------------------|-----------------------------|-----|-------|-----------------------------|
| 1        | Lu                    | +  | +                     | +  | 1    | H                     | DCM                          | FI-LC                       | DR                          | 17  | 49.81 | 0                           |
| 2        | Lv                    | +  | +                     | +  | 1    | H                     | DCM                          | FI-LC                       | DR                          | 17  | 49.81 | 0                           |
| 3        | H                     | +  | +                     | +  | 1    | H                     | DCM                          | FI-LC                       | DR                          | 17  | 49.81 | 0                           |
| 4        | K                     | -  | +                     | +  | 1    | H                     | DCM                          | FI-LC                       | DR                          | 17  | 49.81 | 0                           |
| 5        | Lu                    | -  | indet. <sup>(7)</sup> | -  | 3    | NH                    | HCM                          | LC-PE                       | HR                          | 94  | 37.03 | 2                           |
| 6        | K                     | -  | -                     | -  | 3    | NH                    | HCM                          | LC-PE                       | HR                          | 94  | 37.03 | 2                           |
| 7        | Lv                    | -  | -                     | -  | 3    | NH                    | HCM                          | LC-PE                       | HR                          | 94  | 37.03 | 2                           |
| 8        | H                     | -  | -                     | +  | 3    | NH                    | HCM                          | LC-PE                       | HR                          | 94  | 37.03 | 2                           |
| 9        | H                     | -  | indet.                | -  | 4    | NH                    | NO                           | LC                          | HR                          | 64  | 43.73 | 2                           |
| 10       | Lu                    | -  | -                     | -  | 4    | NH                    | NO                           | LC                          | HR                          | 64  | 43.73 | 2                           |
| 11       | Lv                    | -  | indet.                | -  | 4    | NH                    | NO                           | LC                          | HR                          | 64  | 43.73 | 2                           |
| 12       | K                     | -  | -                     | +  | 4    | NH                    | NO                           | LC                          | HR                          | 64  | 43.73 | 2                           |
| 13       | H                     | +  | +                     | +  | 5    | NH                    | DHCM                         | NO                          | HR                          | 71  | 72.44 | 0                           |
| 14       | Lv                    | +  | +                     | +  | 5    | NH                    | DHCM                         | NO                          | HR                          | 71  | 72.44 | 0                           |
| 15       | Lu                    | +  | +                     | +  | 5    | NH                    | DHCM                         | NO                          | HR                          | 71  | 72.44 | 0                           |
| 16       | K                     | +  | +                     | +  | 5    | NH                    | DHCM                         | NO                          | HR                          | 71  | 72.44 | 0                           |
| 17       | H                     | -  | -                     | -  | 10   | NH                    | NO                           | LC                          | HR                          | 71  | 54.25 | 3                           |
| 18       | Lu                    | -  | -                     | -  | 10   | NH                    | NO                           | LC                          | HR                          | 71  | 54.25 | 3                           |
| 19       | Lv                    | -  | -                     | -  | 10   | NH                    | NO                           | LC                          | HR                          | 71  | 54.25 | 3                           |
| 20       | K                     | -  | -                     | -  | 10   | NH                    | NO                           | LC                          | HR                          | 71  | 54.25 | 3                           |
| 21       | I                     | -  | indet.                | +  | 10   | NH                    | NO                           | LC                          | HR                          | 71  | 54.25 | 3                           |
| 22       | H                     | -  | -                     | +  | 11   | NH                    | NO                           | LC                          | HR                          | 69  | 62.92 | 0                           |

|    |    |   |        |   |    |    |    |       |    |    |       |    |
|----|----|---|--------|---|----|----|----|-------|----|----|-------|----|
| 23 | Lu | + | +      | + | 11 | NH | NO | LC    | HR | 69 | 62.92 | 0  |
| 24 | Lv | - | -      | - | 11 | NH | NO | LC    | HR | 69 | 62.92 | 0  |
| 25 | K  | + | +      | + | 11 | NH | NO | LC    | HR | 69 | 62.92 | 0  |
| 26 | I  | + | +      | + | 11 | NH | NO | LC    | HR | 69 | 62.92 | 0  |
| 27 | H  | + | +      | + | 12 | NH | NO | PE    | DR | 81 | 34.54 | 4  |
| 28 | Lu | + | +      | + | 12 | NH | NO | PE    | DR | 81 | 34.54 | 4  |
| 29 | Lv | - | +      | - | 12 | NH | NO | PE    | DR | 81 | 34.54 | 4  |
| 30 | K  | - | +      | + | 12 | NH | NO | PE    | DR | 81 | 34.54 | 4  |
| 31 | I  | + | +      | - | 12 | NH | NO | PE    | DR | 81 | 34.54 | 4  |
| 32 | H  | + | +      | + | 14 | NH | NO | LC    | NA | 84 | 44.76 | NA |
| 33 | Lu | - | +      | - | 14 | NH | NO | LC    | NA | 84 | 44.76 | NA |
| 34 | Lv | - | indet. | - | 14 | NH | NO | LC    | NA | 84 | 44.76 | NA |
| 35 | I  | - | +      | + | 14 | NH | NO | LC    | NA | 84 | 44.76 | NA |
| 36 | K  | - | +      | + | 14 | NH | NO | LC    | NA | 84 | 44.76 | NA |
| 37 | H  | - | -      | - | 15 | NH | NO | LC    | DR | 69 | 63.48 | 0  |
| 38 | Lu | + | +      | + | 15 | NH | NO | LC    | DR | 69 | 63.48 | 0  |
| 39 | K  | - | -      | - | 15 | NH | NO | LC    | DR | 69 | 63.48 | 0  |
| 40 | Lv | + | -      | - | 15 | NH | NO | LC    | DR | 69 | 63.48 | 0  |
| 41 | I  | + | indet. | - | 15 | NH | NO | LC    | DR | 69 | 63.48 | 0  |
| 42 | Lu | + | +      | + | 18 | NH | NO | LC-PE | DR | 92 | 54.17 | 3  |
| 43 | H  | - | +      | + | 18 | NH | NO | LC-PE | DR | 92 | 54.17 | 3  |
| 44 | Lv | - | +      | + | 18 | NH | NO | LC-PE | DR | 92 | 54.17 | 3  |
| 45 | K  | - | +      | + | 18 | NH | NO | LC-PE | DR | 92 | 54.17 | 3  |
| 46 | I  | + | +      | + | 18 | NH | NO | LC-PE | DR | 92 | 54.17 | 3  |
| 47 | H  | - | +      | + | 19 | H  | NO | LC    | HR | 54 | 70.91 | 1  |

|    |    |   |        |   |    |    |     |       |    |    |       |   |
|----|----|---|--------|---|----|----|-----|-------|----|----|-------|---|
| 48 | Lu | - | +      | + | 19 | H  | NO  | LC    | HR | 54 | 70.91 | 1 |
| 49 | Lv | - | -      | - | 19 | H  | NO  | LC    | HR | 54 | 70.91 | 1 |
| 50 | K  | - | -      | + | 19 | H  | NO  | LC    | HR | 54 | 70.91 | 1 |
| 51 | I  | + | +      | + | 19 | H  | NO  | LC    | HR | 54 | 70.91 | 1 |
| 52 | H  | + | +      | + | 24 | H  | NO  | PE    | DR | 35 | 54.45 | 1 |
| 53 | Lu | + | +      | + | 24 | H  | NO  | PE    | DR | 35 | 54.45 | 1 |
| 54 | Lv | - | -      | + | 24 | H  | NO  | PE    | DR | 35 | 54.45 | 1 |
| 55 | K  | + | +      | + | 24 | H  | NO  | PE    | DR | 35 | 54.45 | 1 |
| 56 | I  | + | +      | + | 24 | H  | NO  | PE    | DR | 35 | 54.45 | 1 |
| 57 | H  | - | indet. | + | 25 | NH | NO  | LC    | DR | 34 | 46.08 | 3 |
| 58 | Lu | + | +      | + | 25 | NH | NO  | LC    | DR | 34 | 46.08 | 3 |
| 59 | Lv | - | +      | - | 25 | NH | NO  | LC    | DR | 34 | 46.08 | 3 |
| 60 | K  | - | indet. | + | 25 | NH | NO  | LC    | DR | 34 | 46.08 | 3 |
| 61 | I  | - | indet. | - | 25 | NH | NO  | LC    | DR | 34 | 46.08 | 3 |
| 62 | H  | + | +      | + | 28 | NH | HCM | PH-PE | HR | 66 | 65.96 | 2 |
| 63 | Lv | + | +      | + | 28 | NH | HCM | PH-PE | HR | 66 | 65.96 | 2 |
| 64 | K  | + | +      | + | 28 | NH | HCM | PH-PE | HR | 66 | 65.96 | 2 |
| 65 | I  | + | +      | + | 28 | NH | HCM | PH-PE | HR | 66 | 65.96 | 2 |
| 66 | Lu | + | +      | + | 28 | NH | HCM | PH-PE | HR | 66 | 65.96 | 2 |
| 67 | H  | - | indet. | + | 29 | H  | NO  | LC    | HR | 59 | 53.53 | 0 |
| 68 | Lu | - | -      | + | 29 | H  | NO  | LC    | HR | 59 | 53.53 | 0 |
| 69 | Lv | - | -      | - | 29 | H  | NO  | LC    | HR | 59 | 53.53 | 0 |
| 70 | K  | - | +      | - | 29 | H  | NO  | LC    | HR | 59 | 53.53 | 0 |
| 71 | I  | - | -      | - | 29 | H  | NO  | LC    | HR | 59 | 53.53 | 0 |

<sup>(1)</sup> *H* heart; *I* intestine; *K* kidney; *Lv* liver; *Lu* lung.

<sup>(2)</sup> Antemortem status: *H* hospitalized; *NH* non-hospitalized.

- <sup>(3)</sup> *DCM* dilated cardiomyopathy; *HCM* hypertrophic cardiomyopathy.
- <sup>(4)</sup> *PE* pulmonary edema; *PC* pulmonary congestion; *PH* pulmonary hemorrhage; *FI* firearm injury.
- <sup>(5)</sup> *DR* diffuse lung radiopacities; *HR* heterogeneous lung radiopacities.
- <sup>(6)</sup> *0* not vaccinated; *1-3* one to three doses; *NA* no data available.
- <sup>(7)</sup> Indeterminate.
