# Supplementary material
Source: PubMed Central journal article supplement (PMC11656291)
Supplement: JMV-96-0-s006.pdf [file JMV-96-0-s006.pdf]

**Table S2.** Organ specimens submitted to metagenome sequencing and corresponding data relative to MN908947.3 reference genome.

| Specimen | Organ     | Coverage (%) | Covered bases | Average depth | Depth >= 500 | Pass filter <sup>(1)</sup> |
|----------|-----------|--------------|---------------|---------------|--------------|----------------------------|
| 13       | heart     | 99           | 29857         | 32455         | 29759        | 29744                      |
| 14       | kidney    | 99           | 29857         | 26796         | 29787        | 29744                      |
| 15       | liver     | 99           | 29854         | 25352         | 29782        | 29744                      |
| 16       | lung      | 99           | 29868         | 24954         | 29792        | 29744                      |
| 42       | heart     | 97           | 29164         | 25923         | 28536        | 547/ 19172 <sup>(2)</sup>  |
| 43       | intestine | 97           | 29158         | 8931          | 23600        | 547/ 19172                 |
| 44       | kidney    | 97           | 29156         | 4496          | 19438        | 547/ 19172                 |
| 45       | liver     | 56           | 16878         | 156           | 548          | 547                        |
| 46       | lung      | 98           | 29531         | 17259         | 28603        | 547/ 19172                 |
| 52       | heart     | 99           | 29803         | 28897         | 29091        | 24140                      |
| 53       | intestine | 98           | 29435         | 15503         | 26015        | 24140                      |
| 54       | kidney    | 97           | 29177         | 19789         | 28782        | 24140                      |
| 55       | liver     | 91           | 27494         | 29670         | 26686        | 24140                      |
| 56       | lung      | 98           | 29479         | 27453         | 28821        | 24140                      |
| 62       | heart     | 98           | 29453         | 29145         | 29060        | 27755                      |
| 63       | intestine | 98           | 29280         | 17703         | 28796        | 27755                      |
| 64       | kidney    | 98           | 29238         | 28302         | 29154        | 27755                      |
| 65       | liver     | 97           | 28946         | 17972         | 28075        | 27755                      |
| 66       | lung      | 99           | 29839         | 30301         | 29067        | 27755                      |

<sup>1</sup> Sequenced positions that passed filtering.

<sup>2</sup> Including case's liver / without case's liver.
