# Supplementary material
Source: PubMed Central journal article supplement (PMC11656291)

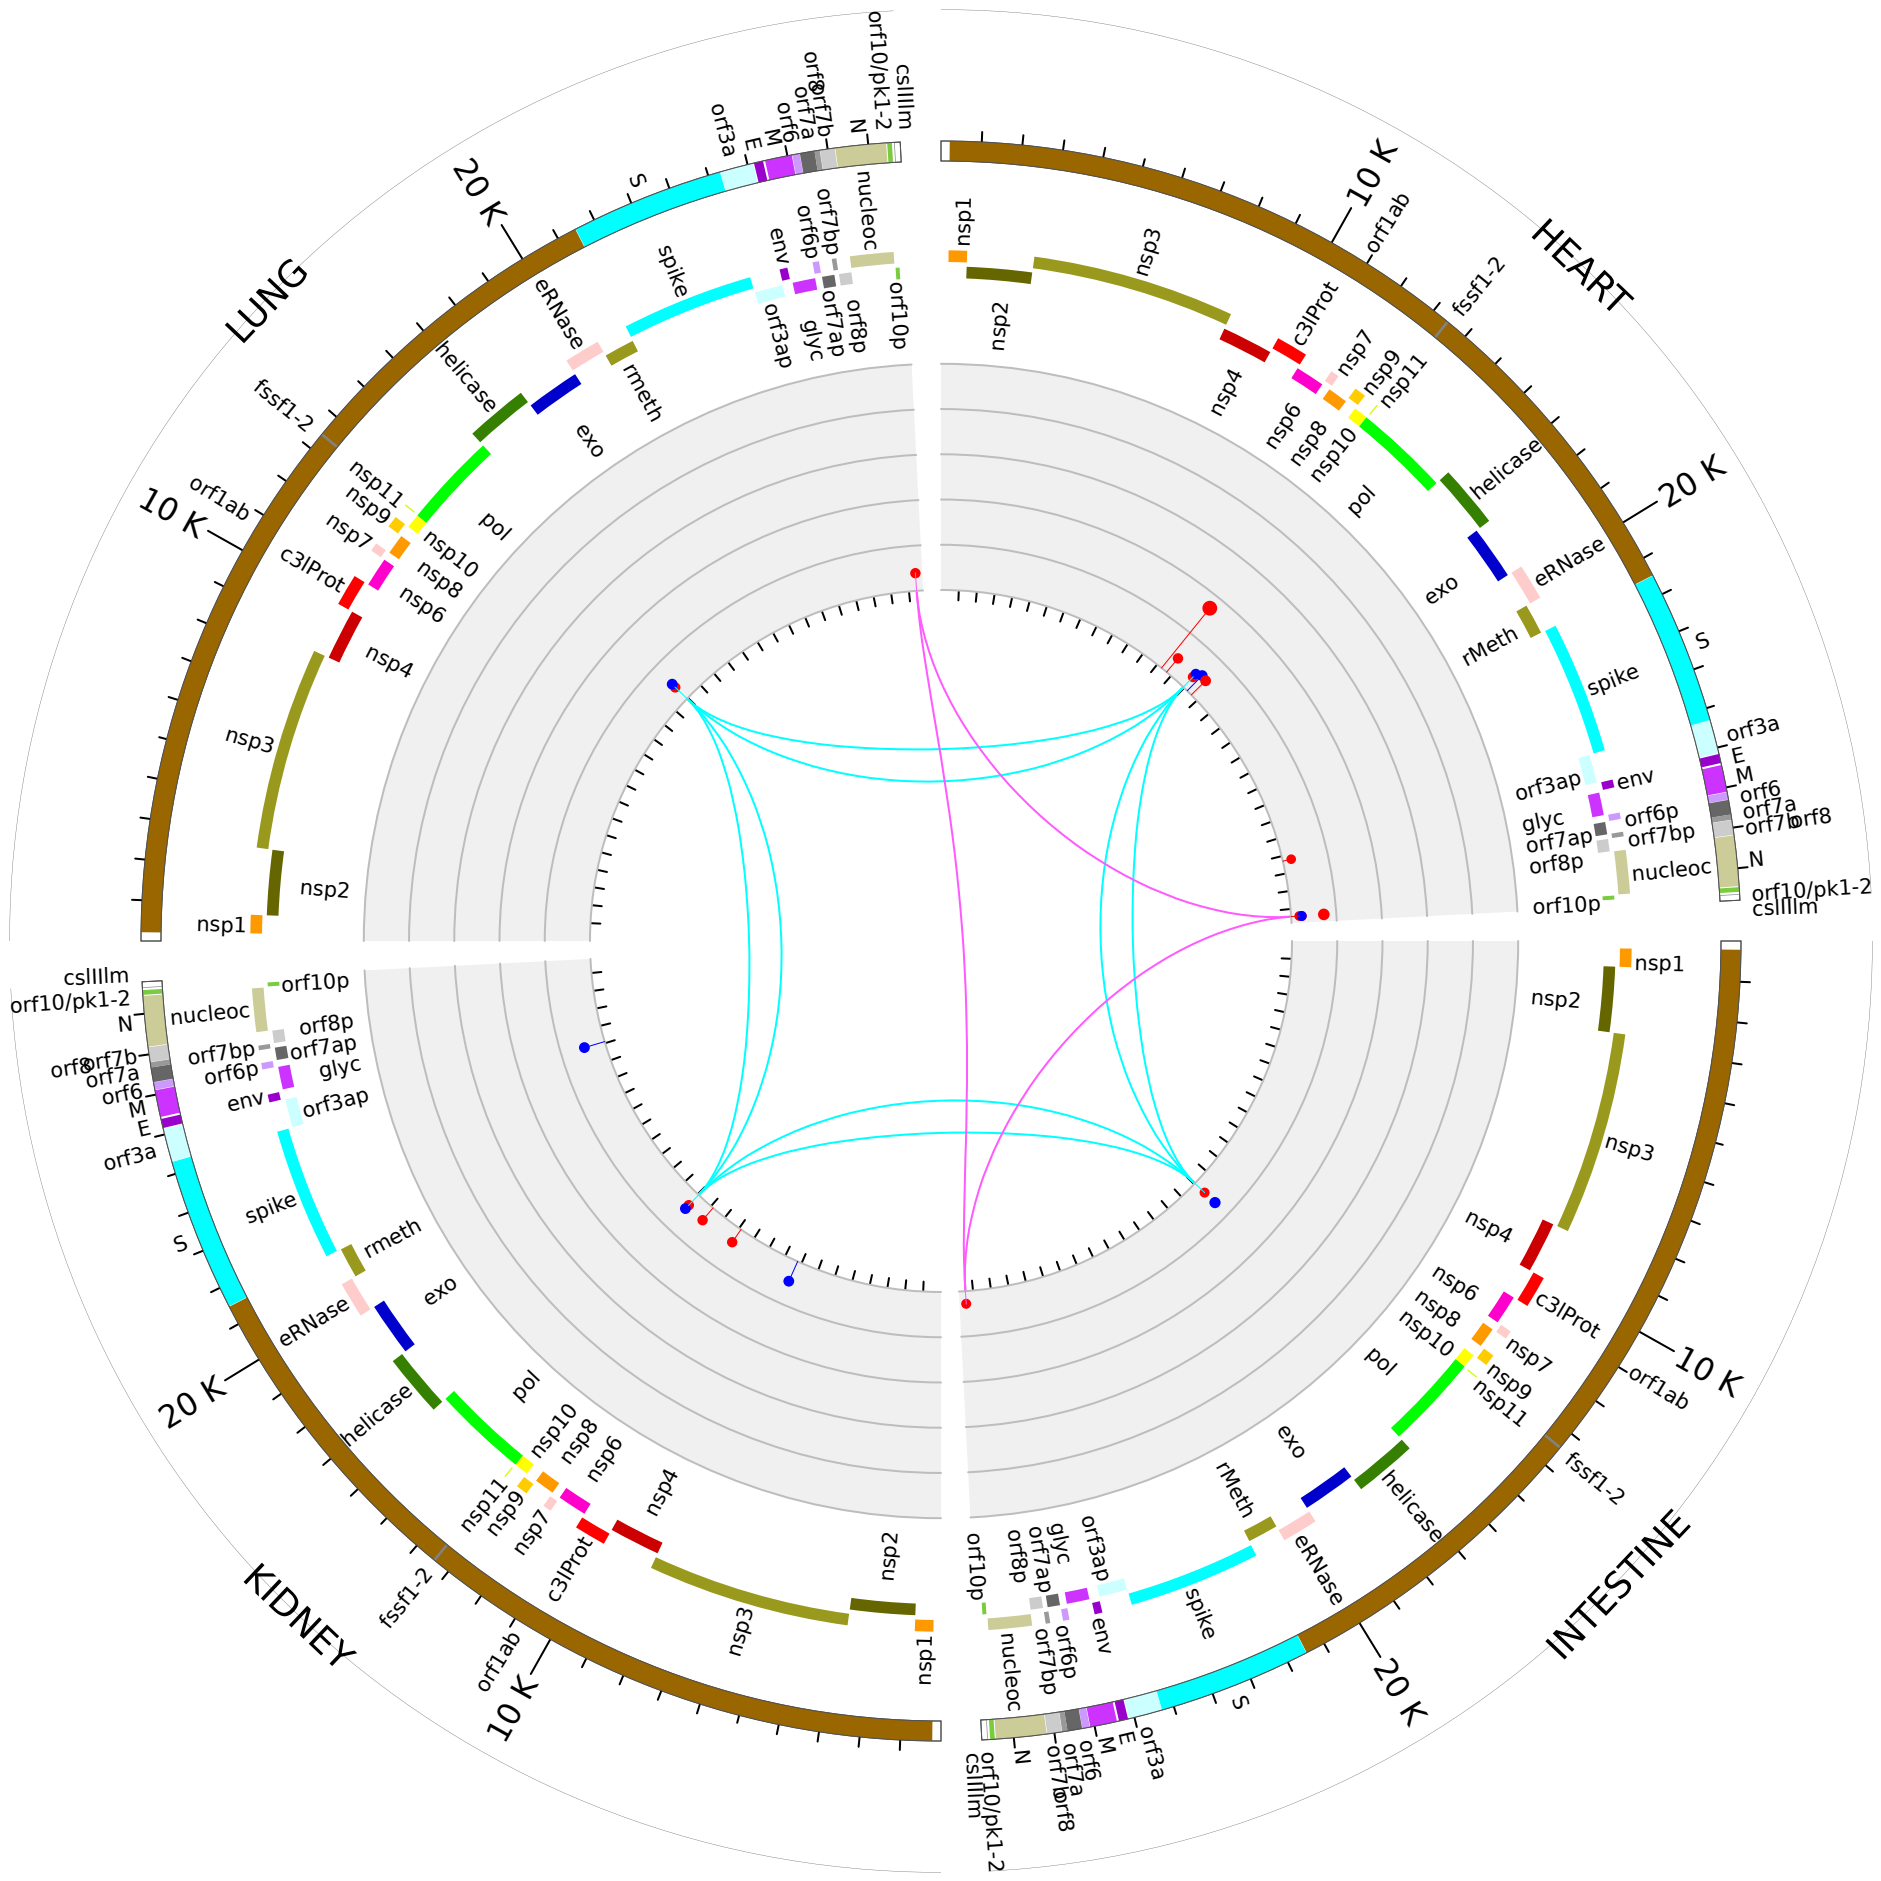

Supplement: JMV-96-0-s002.pdf [file JMV-96-0-s002.pdf]

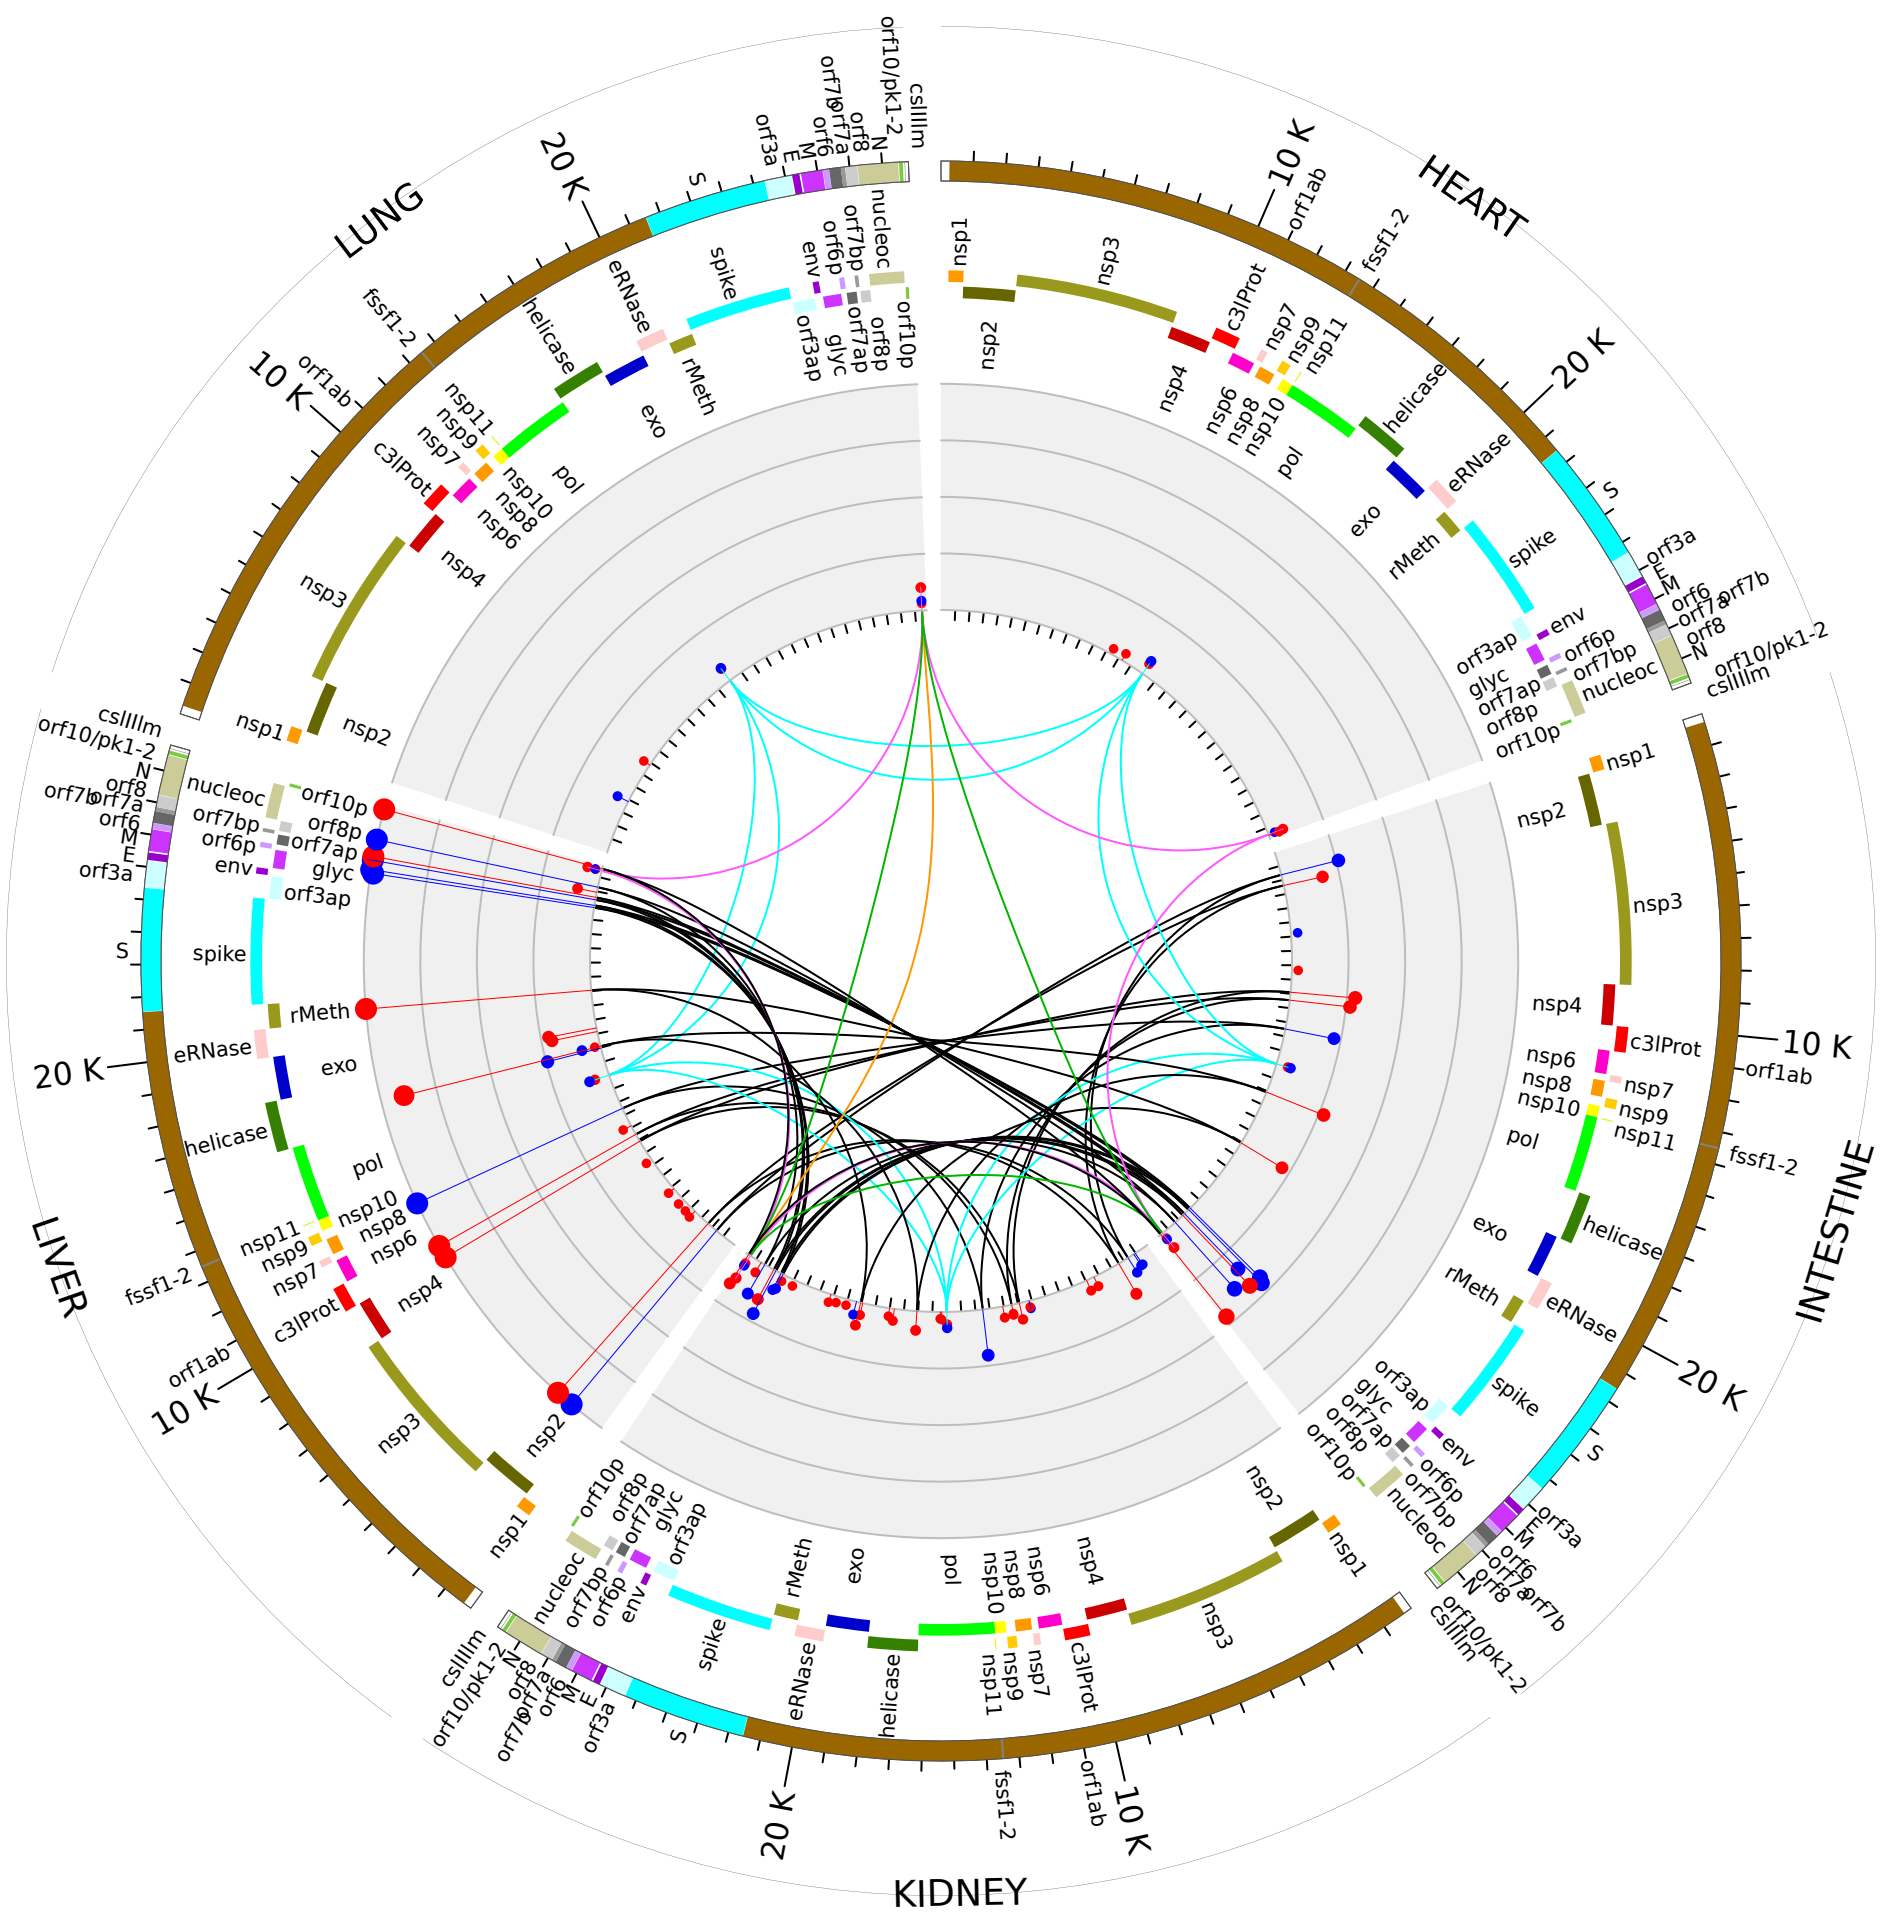

Supplement: JMV-96-0-s003.pdf [file JMV-96-0-s003.pdf]

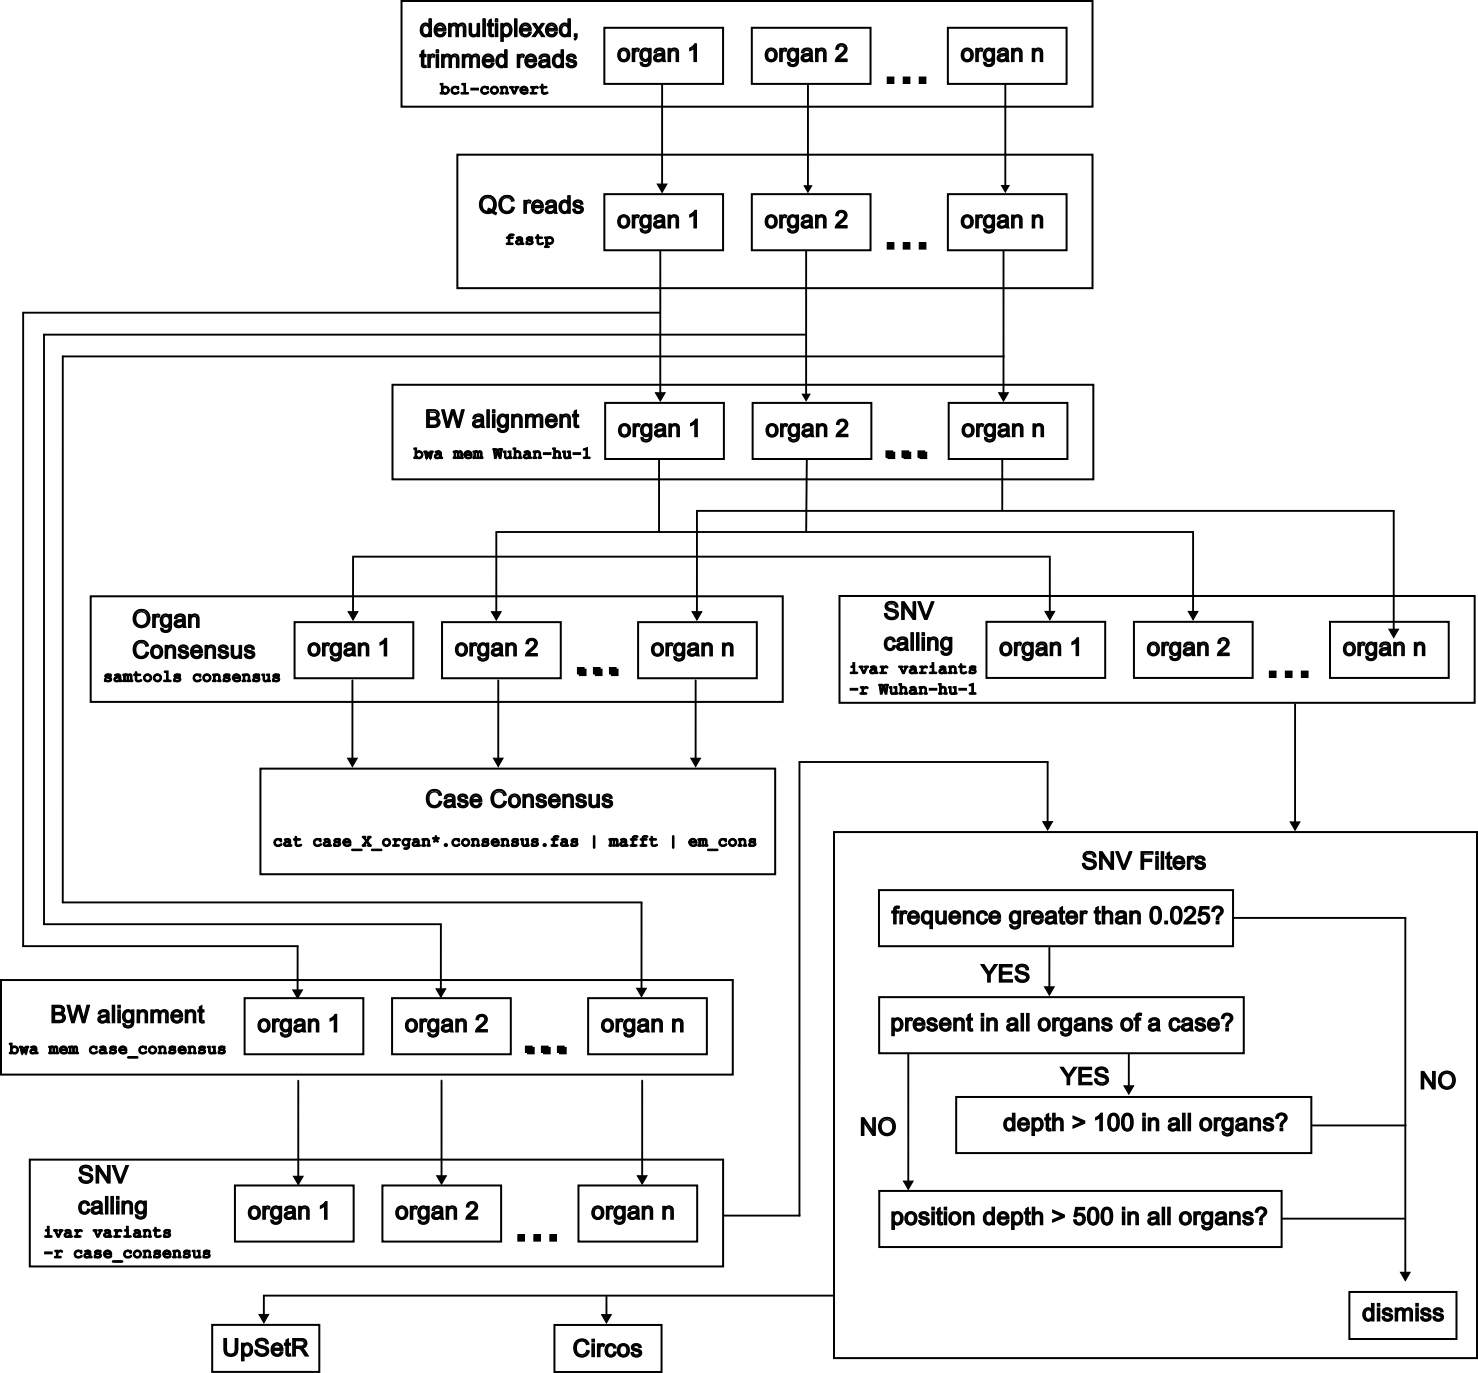

Supplement: JMV-96-0-s005.pdf [file JMV-96-0-s005.pdf]

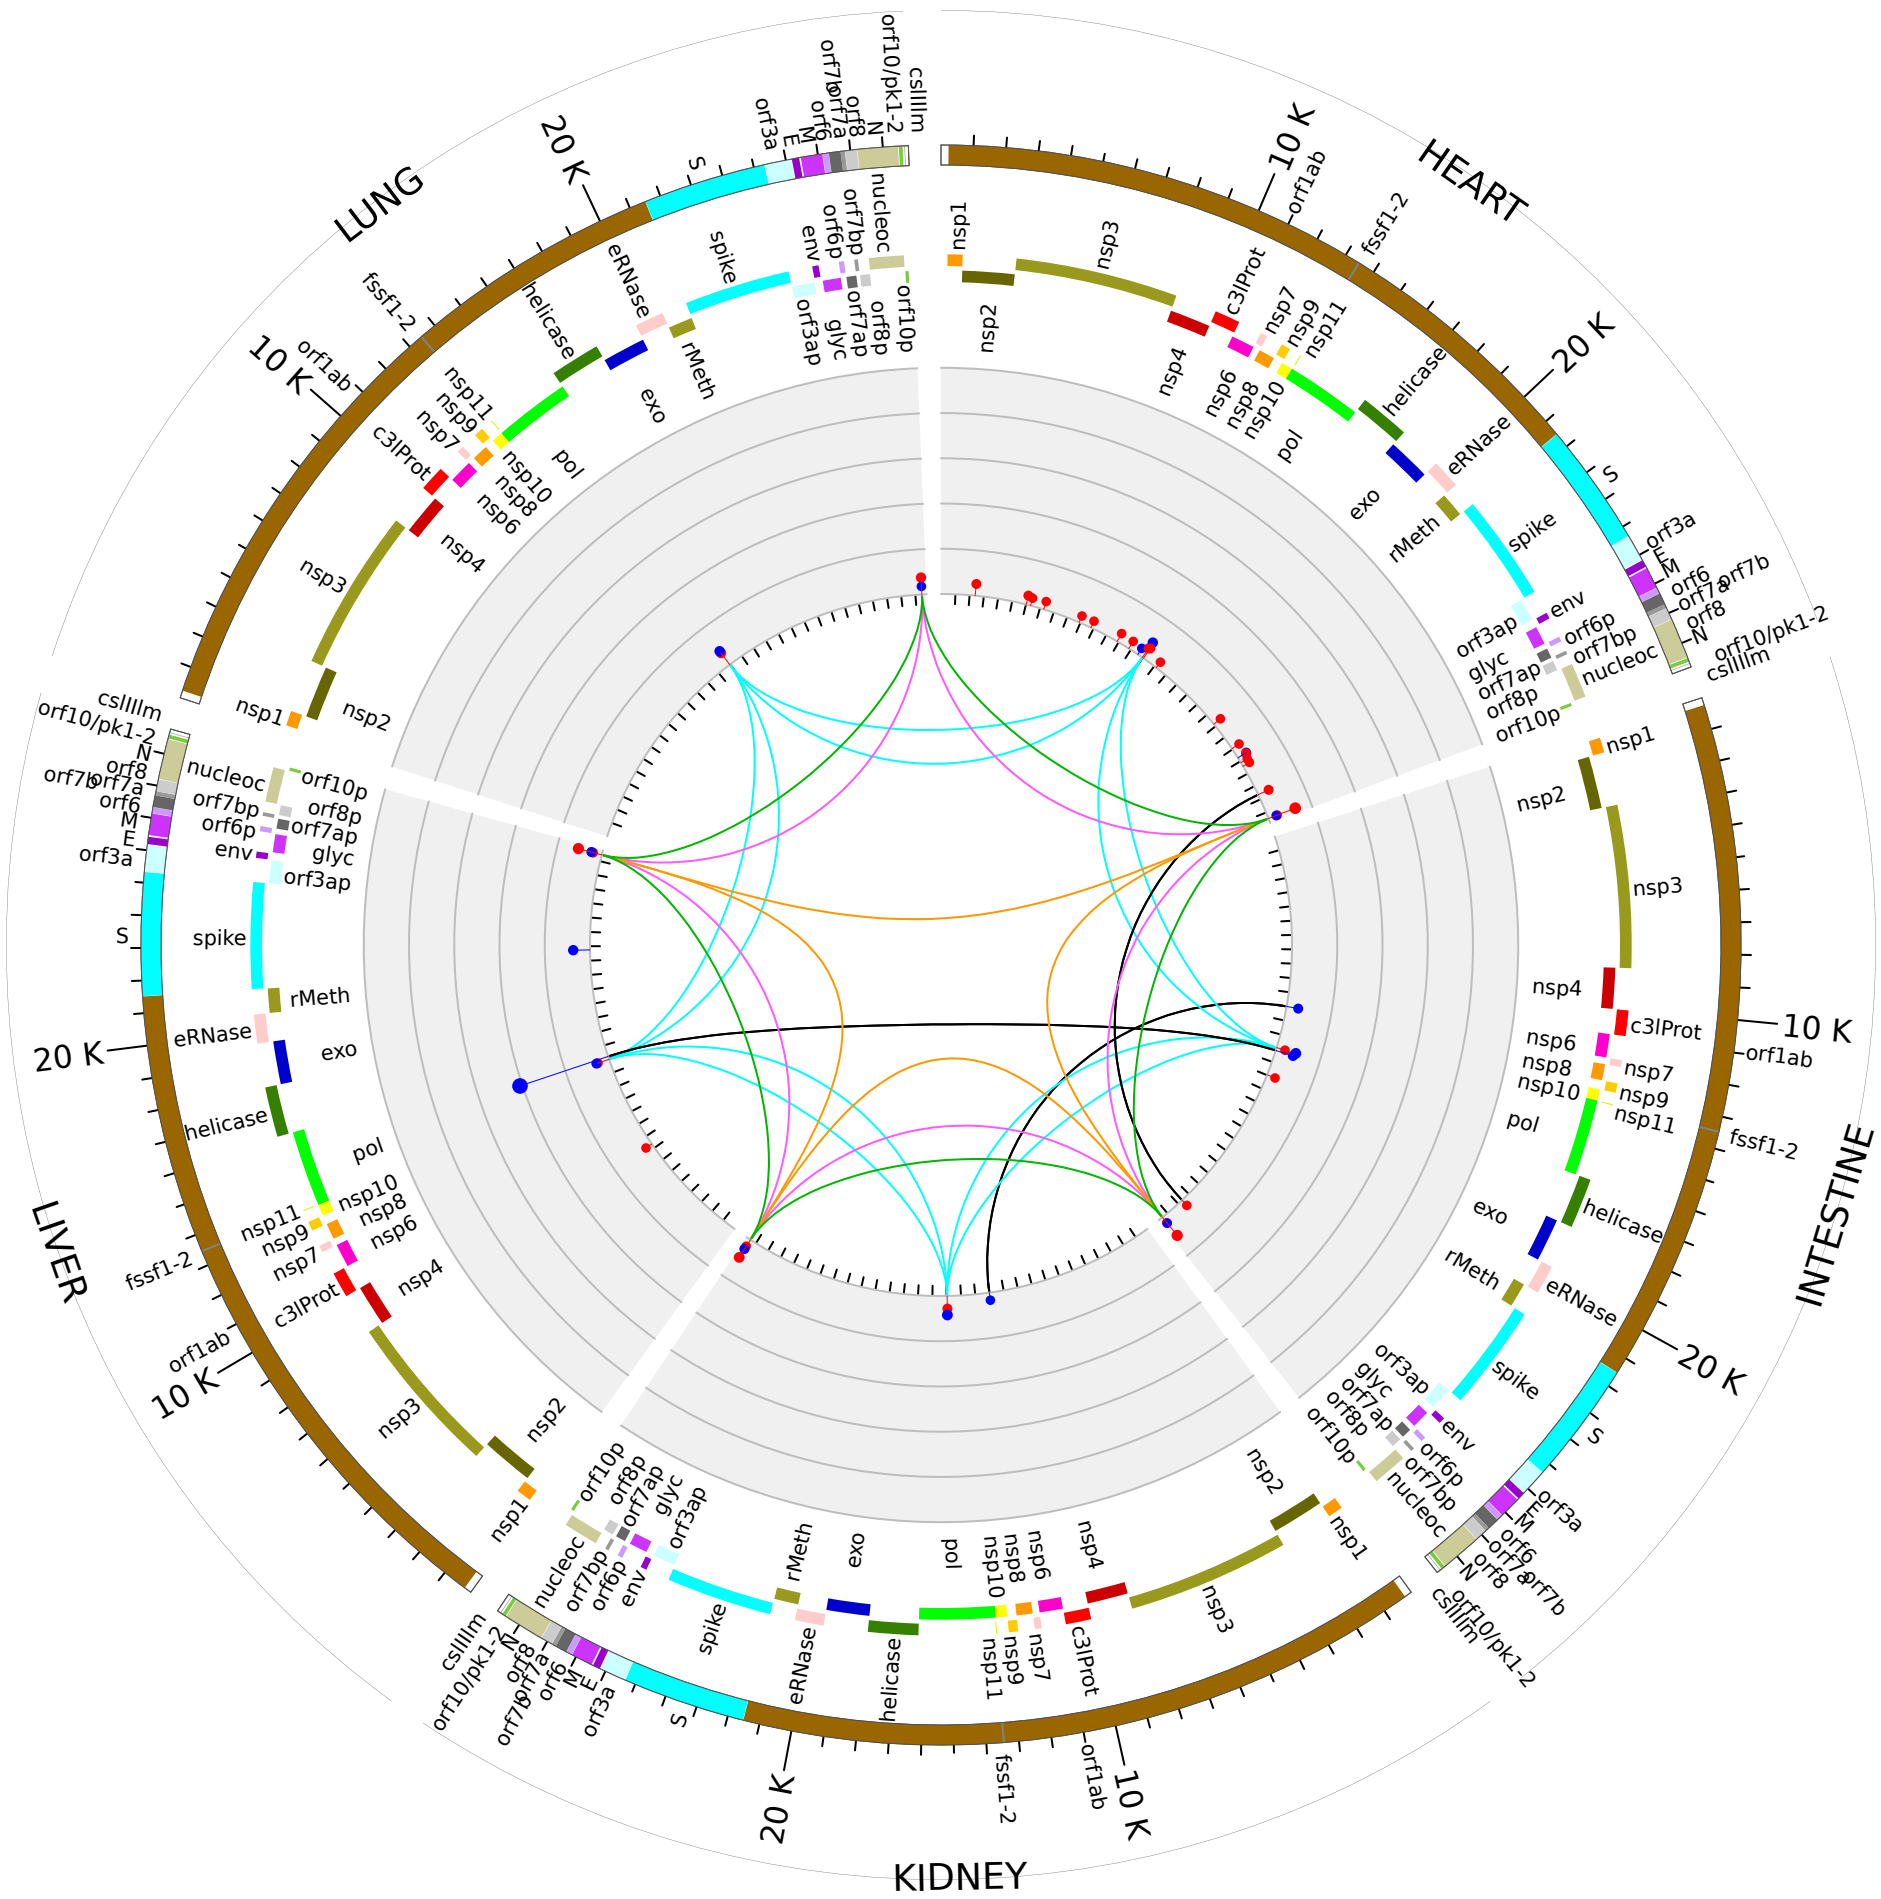

Supplement: JMV-96-0-s007.pdf [file JMV-96-0-s007.pdf]

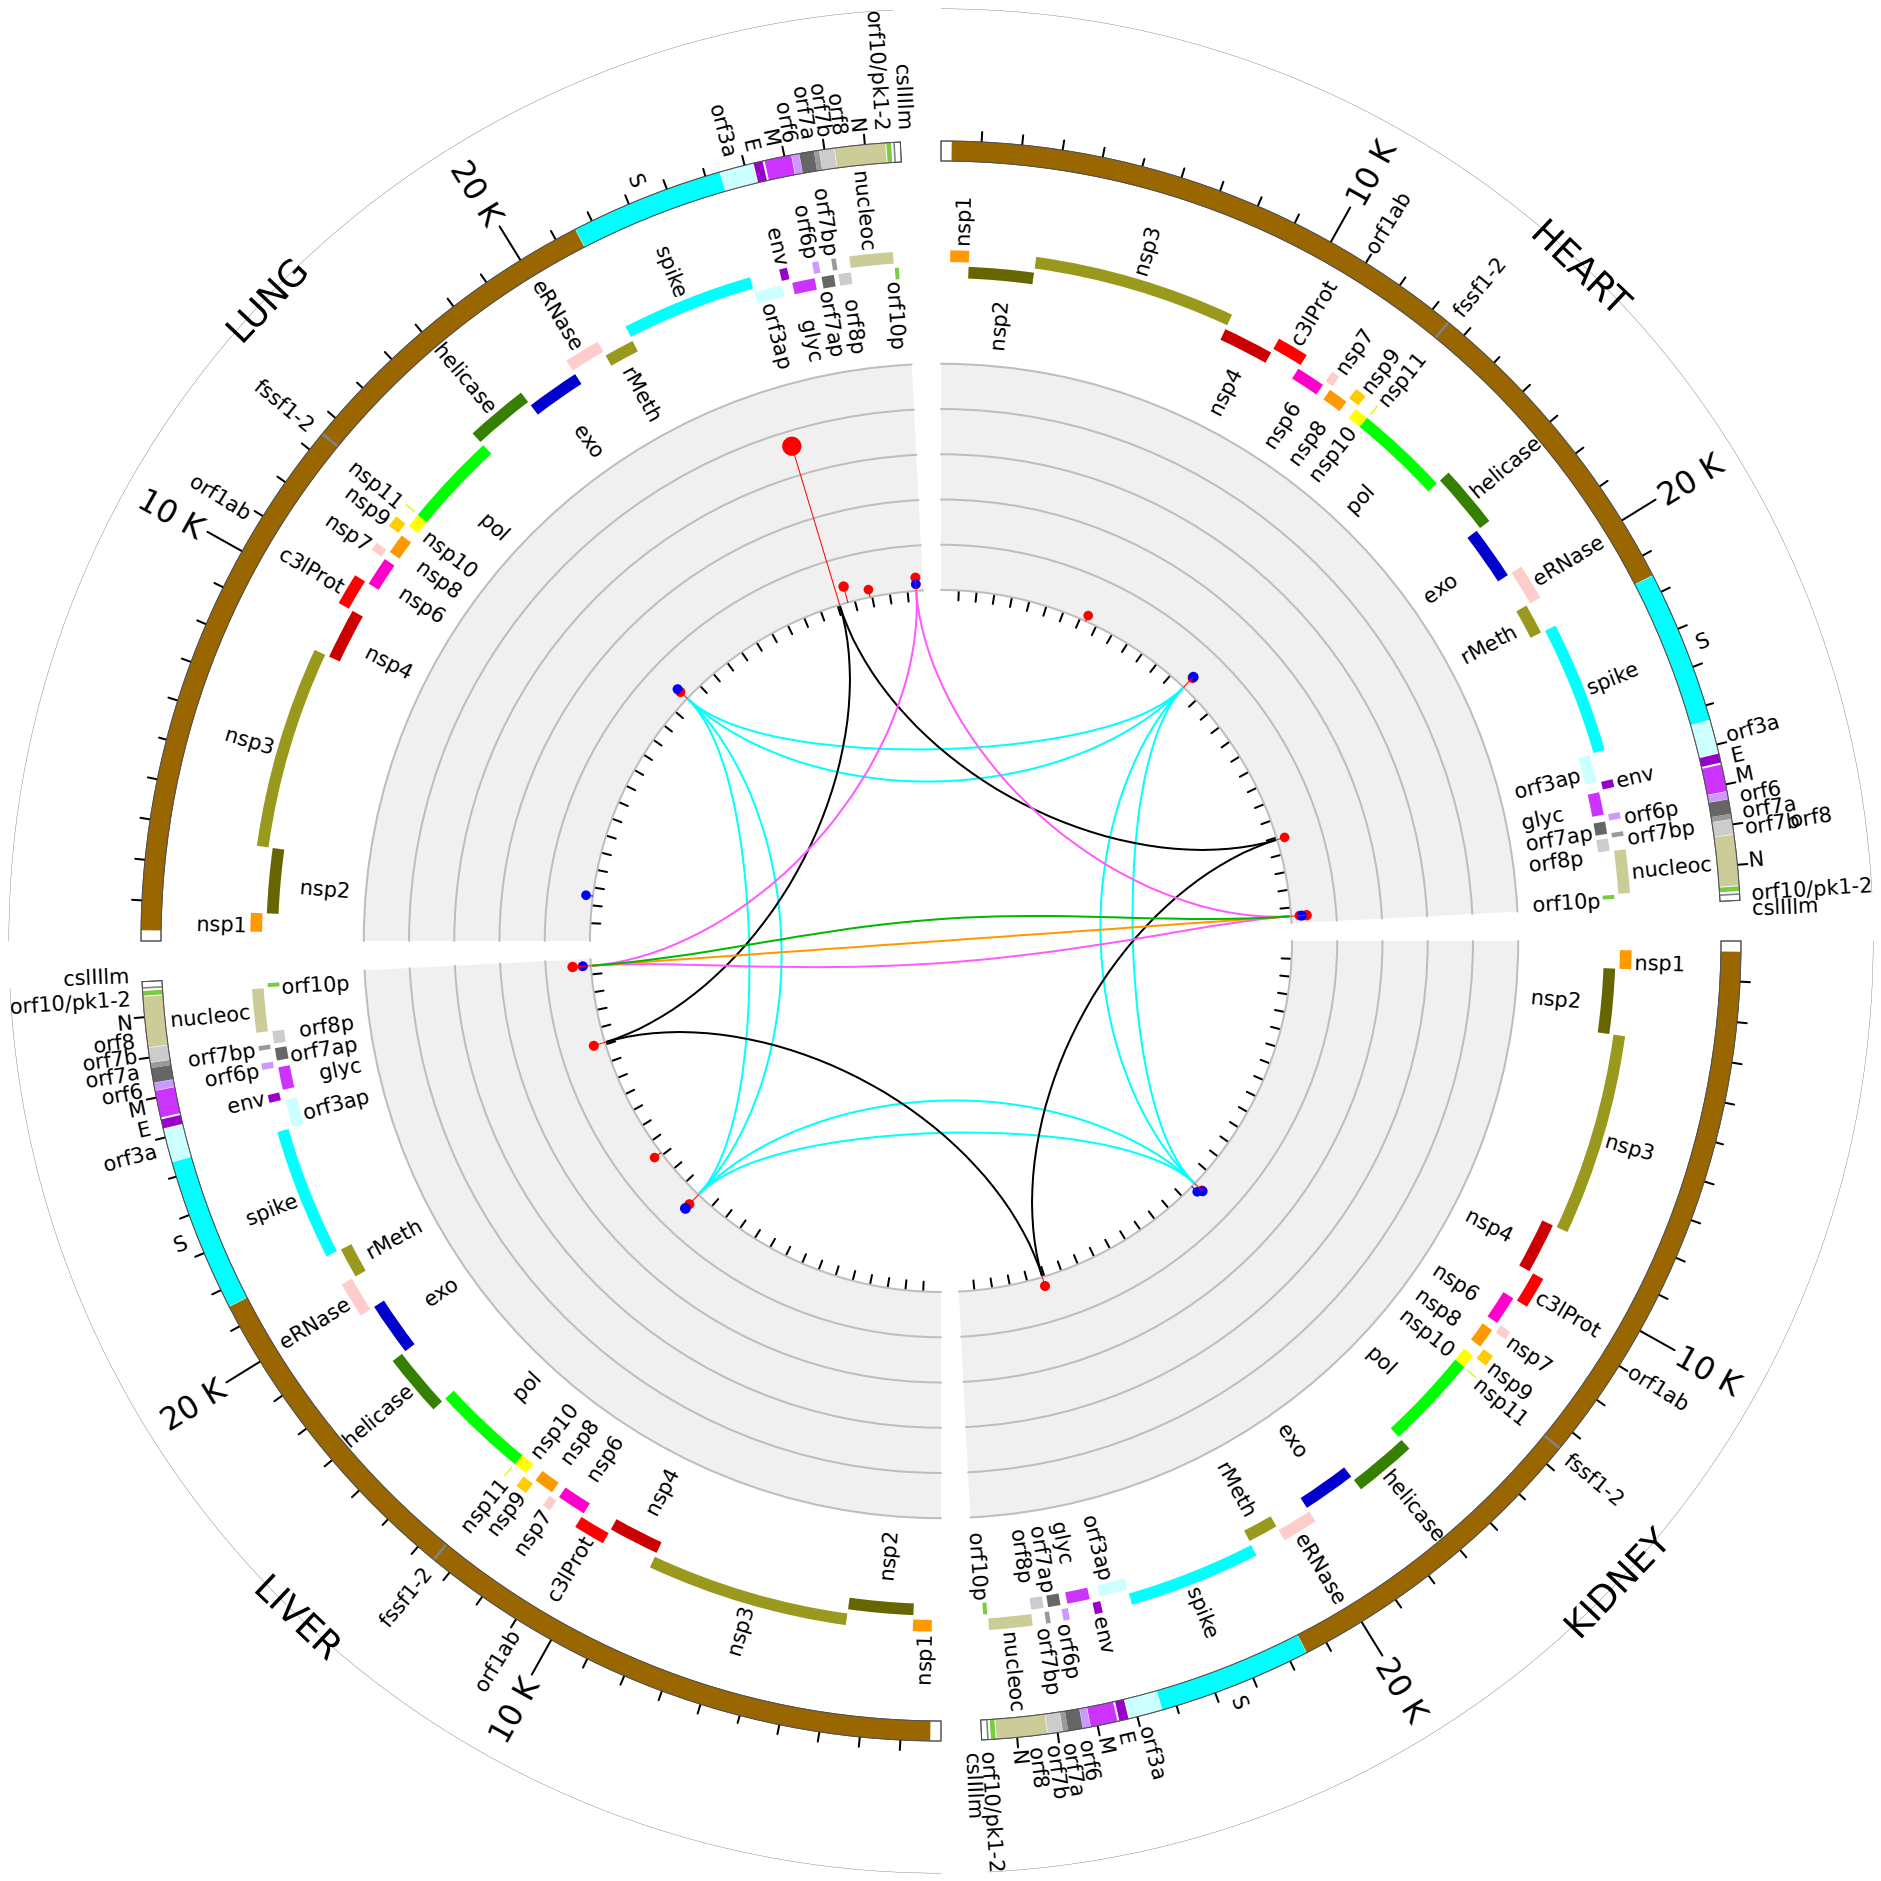

Supplement: JMV-96-0-s009.pdf [file JMV-96-0-s009.pdf]
